# Supplementary material for: A highly selective fluorescent probe for human NAD(P)H:quinone oxidoreductase 1 (hNQO1) detection and imaging in living tumor cells
Source: Royal Society of Chemistry journal article supplement (doi:10.1039/c9ra05650e), 2019-01-01
Supplement: c9ra05650e1.pdf [file c9ra05650e1.pdf]

# A highly selective fluorescent probe for human NAD(P)H:quinone oxidoreductase 1 (hNQO1) detection and imaging in living tumor cells

Ya Zhu,<sup>‡a</sup> Jialing Han,<sup>‡a</sup> Qian Zhang,<sup>a</sup> Zhou Zhao,<sup>a</sup> Jin Wang,<sup>a</sup> Xiaowei Xu,<sup>\*a</sup> Haiping Hao<sup>\*a</sup> and Jun Zhang<sup>\*b</sup>

<sup>a</sup> School of Pharmacy, China Pharmaceutical University, 210009, Nanjing, China

<sup>b</sup> School of Pharmacy, Nanjing Medical University, 211166, Nanjing, China

<sup>‡</sup> These authors contribute equally to this work.

\* Corresponding authors Email: [xw@cpu.edu.cn](mailto:xw@cpu.edu.cn) (Xiaowei Xu), [haipinghao@cpu.edu.cn](mailto:haipinghao@cpu.edu.cn) (Haiping Hao), [zhangjun@njmu.edu.cn](mailto:zhangjun@njmu.edu.cn) (Jun Zhang)

## Supplementary information

|              |   |
|--------------|---|
| Fig. S1..... | 2 |
| Fig. S2..... | 3 |
| Fig. S3..... | 4 |
| Fig. S4..... | 5 |
| Fig. S5..... | 6 |
| Fig. S6..... | 7 |

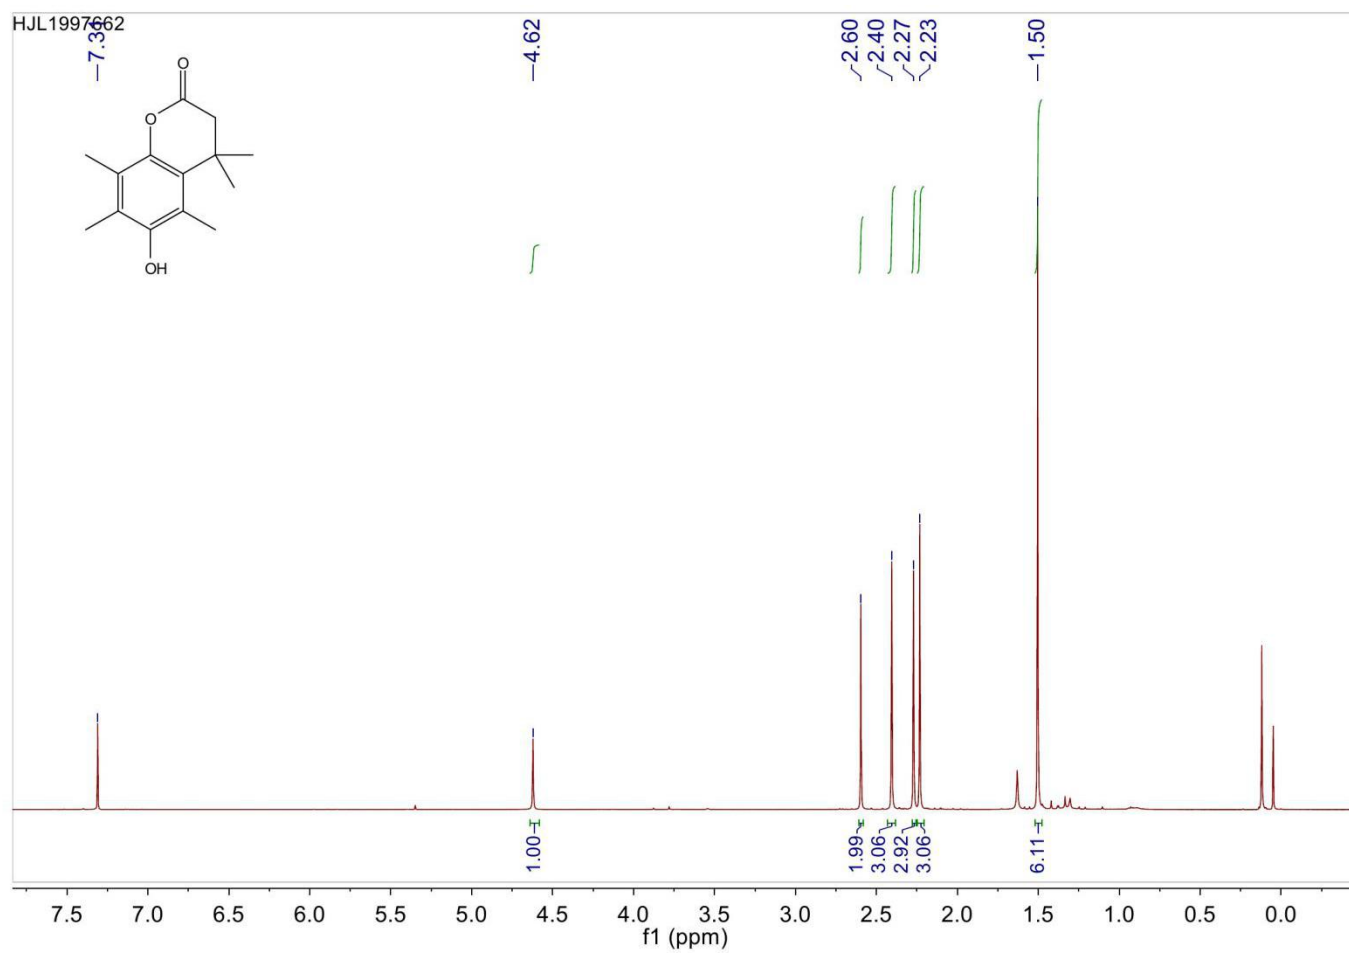

Fig. S1  $^1\text{H}$  NMR of compound 3

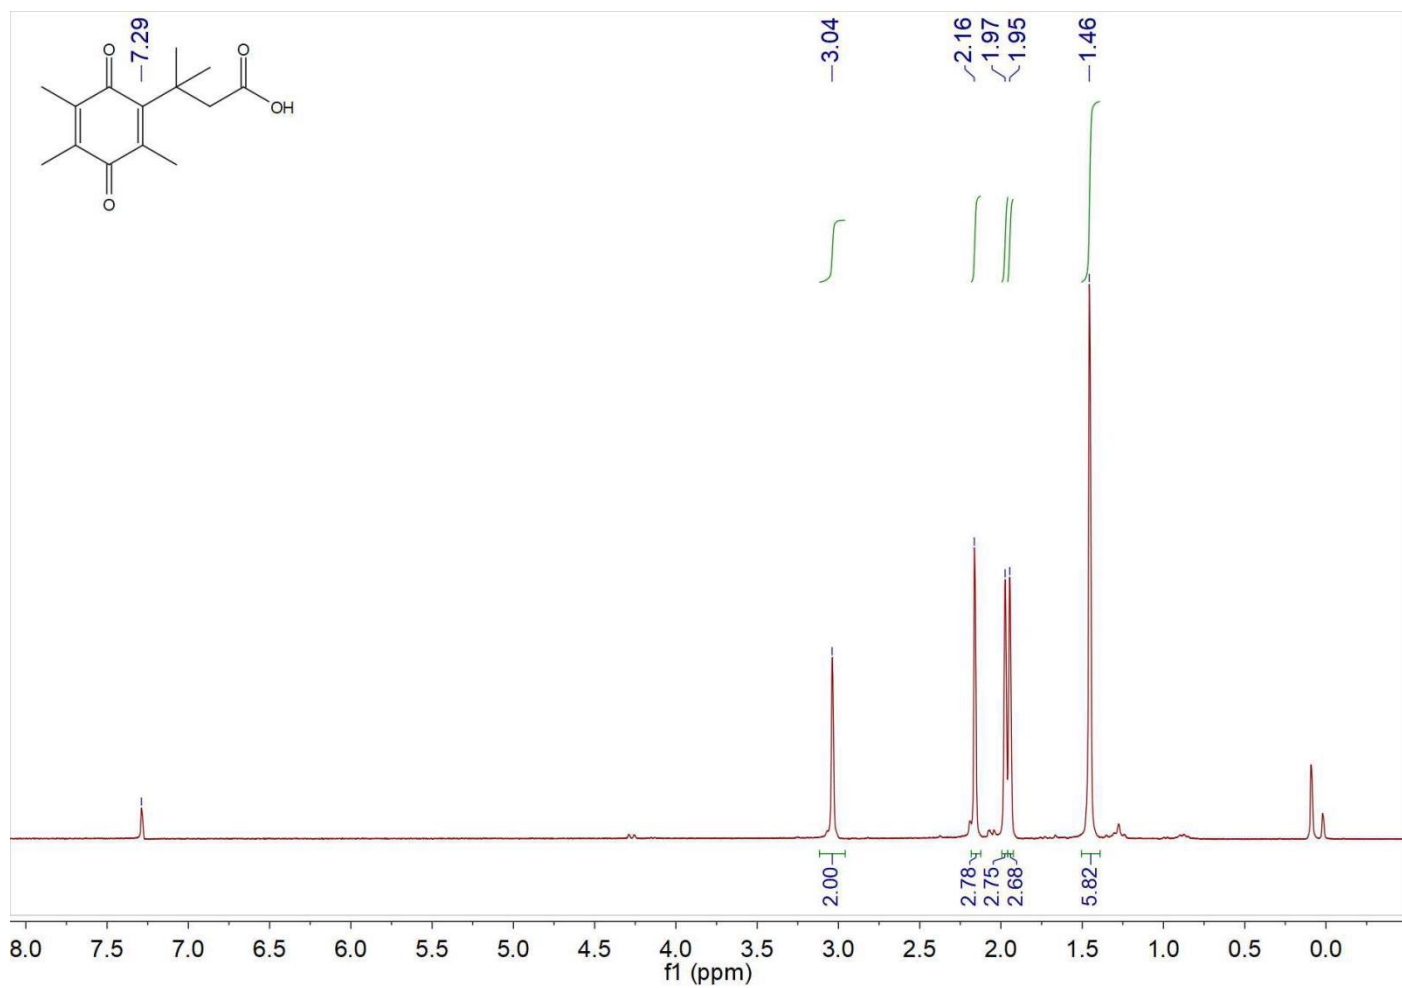

Fig. S2  $^1\text{H}$  NMR of compound 4

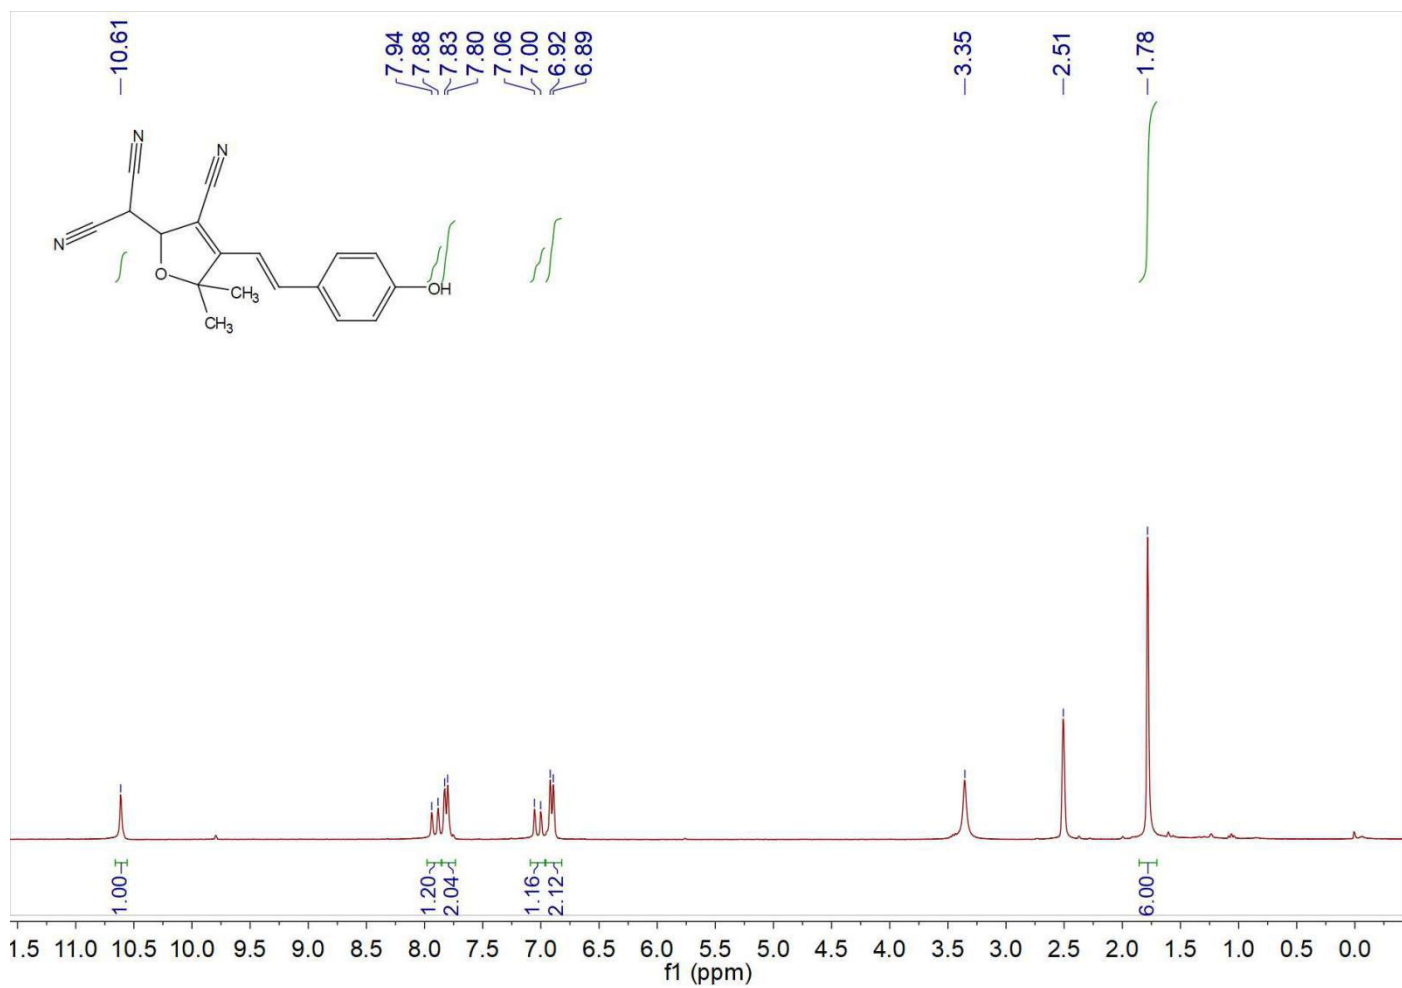Fig. S3  $^1\text{H}$  NMR of compound 7

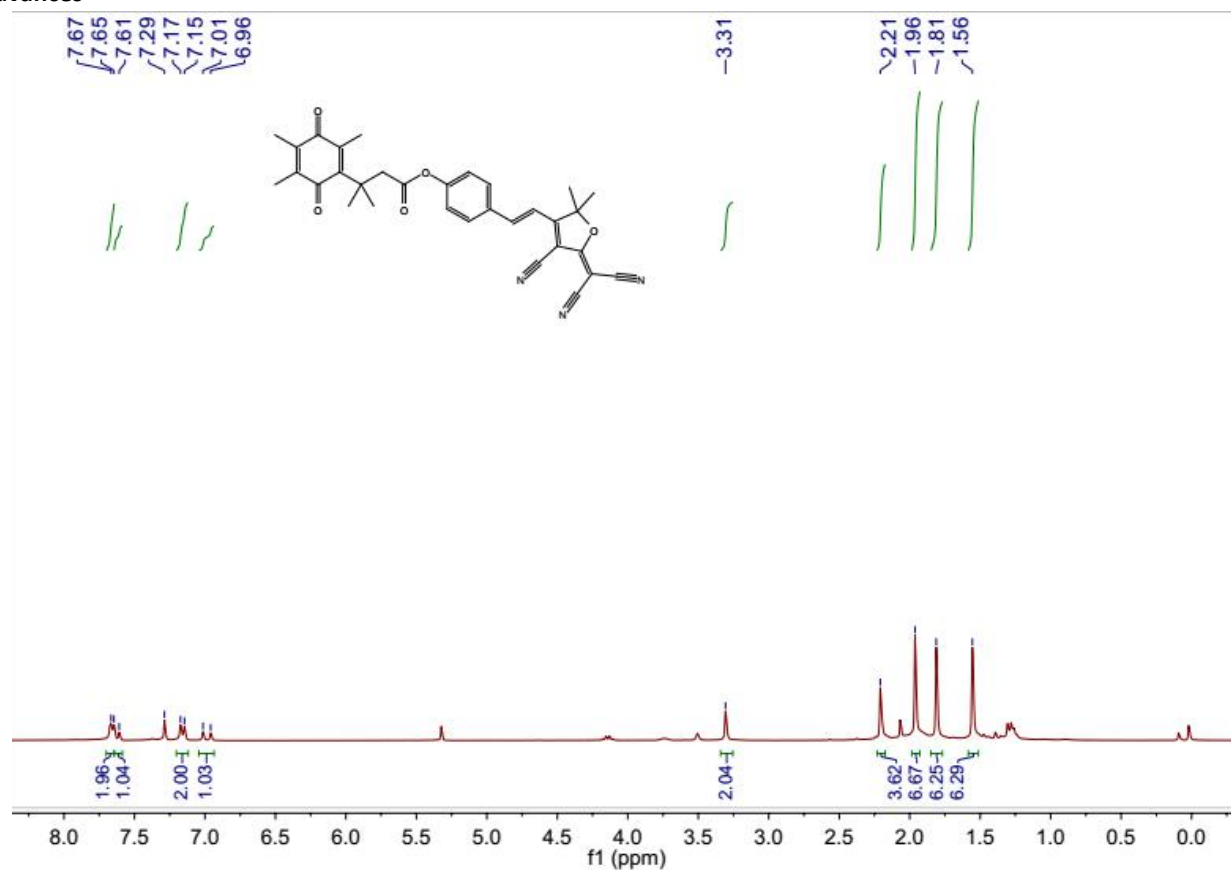

Fig. S4 <sup>1</sup>H NMR spectra of probe 1

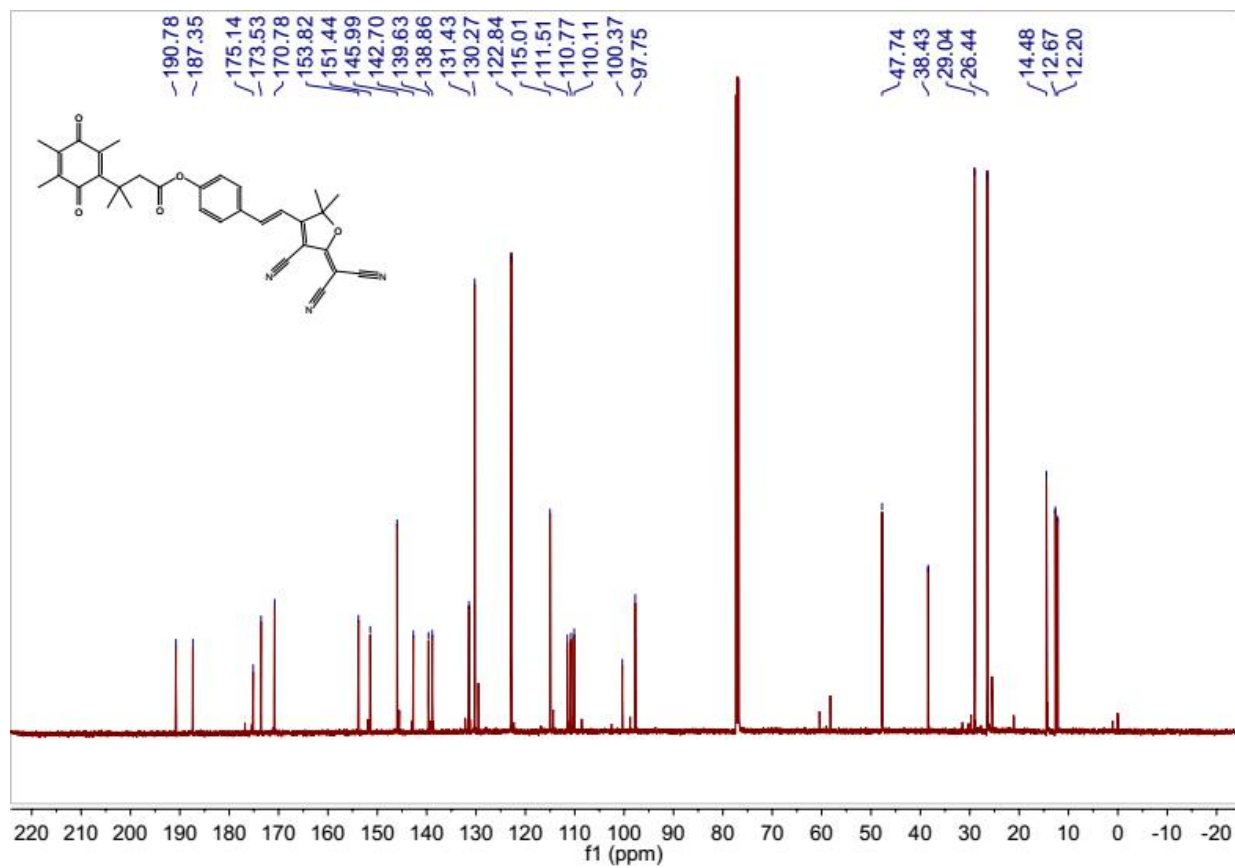

Fig. S5  $^{13}\text{C}$  NMR of probe 1

|                    |                     |                               |         |                        |                       |
|--------------------|---------------------|-------------------------------|---------|------------------------|-----------------------|
| <b>Sample Name</b> |                     | <b>Position</b>               | P2B5    | <b>Instrument Name</b> | Instrument 1          |
| <b>User Name</b>   | QTOF-PC\QTOF        | <b>Inj Vol</b>                | 0.5     | <b>InjPosition</b>     |                       |
| <b>Sample Type</b> | Sample              | <b>IRM Calibration Status</b> | Success | <b>Data Filename</b>   | HJL1997669-p.d        |
| <b>ACQ Method</b>  | 20110418-MSonly-p.m | <b>Comment</b>                |         | <b>Acquired Time</b>   | 5/17/2019 12:12:42 PM |

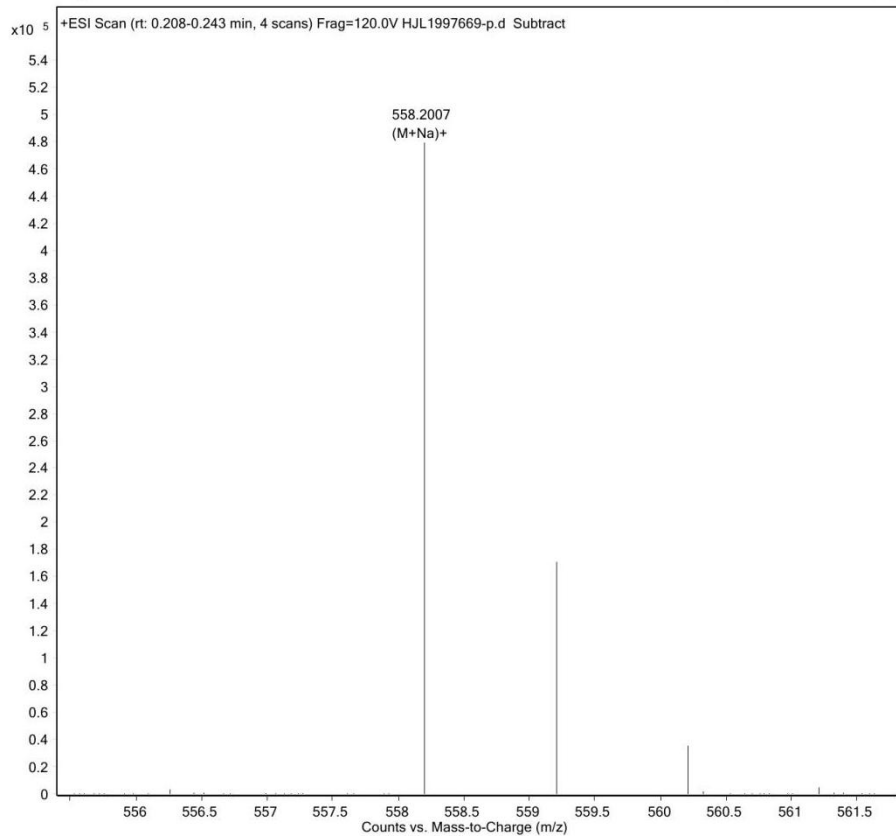

**Fig. S6 HRMS spectra of probe 1**
